# Supplementary material for: Core N-Glycan Structures Are Critical for the Pathogenicity of Cryptococcus neoformans by Modulating Host Cell Death
Source: mBio. 2020 May 12;11(3):e00711-20. doi: 10.1128/mBio.00711-20 (PMC7218283; doi:10.1128/mBio.00711-20)
Supplement: FIG S1 [file mBio.00711-20-sf001.pdf]

## Supplementary Fig. 1

A.

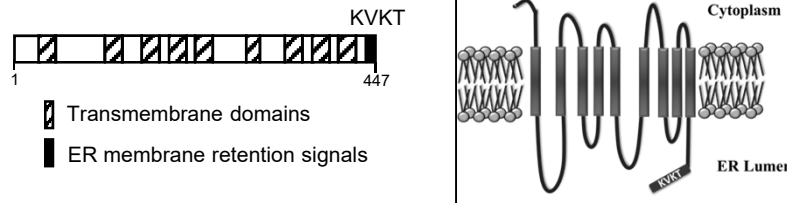

B.

### Percent Identity (%)

| Divergence |         | CnAlg3p | ScAlg3p | HpAlg3p | CaAlg3p | AnAlg3p | SpAlg3p |
|------------|---------|---------|---------|---------|---------|---------|---------|
|            | CnAlg3p |         | 38.3    | 38.6    | 25.1    | 45.5    | 44.5    |
|            | ScAlg3p | 145.5   |         | 43.1    | 33.0    | 40.8    | 39.8    |
|            | HpAlg3p | 134.1   | 121.8   |         | 39.0    | 40.5    | 41.4    |
|            | CaAlg3p | 156.9   | 121.9   | 106.7   |         | 26.9    | 27.1    |
|            | AnAlg3p | 121.1   | 131.0   | 130.2   | 148.1   |         | 52.6    |
|            | SpAlg3p | 130.0   | 144.0   | 129.0   | 152.9   | 114.2   |         |

C.

[illegible]

**FIG S1** Bioinformatics analysis of Alg3 protein. (A) Domain structure of *C. neoformans* Alg3. Predicted transmembrane domains and ER retention signal of Alg3 are indicated by slashes and a box, respectively. (B) Sequence identities and similarities between Alg3 homologs of *S. cerevisiae* (ScAlg3: NP\_009471), *H. polymorpha* (HpAlg3: ABB04524), *C. albicans* (CaAlg3: XP\_712105), *A. niger* (AnAlg3: XP\_001398696), and *S. pombe* (SpAlg3: NP\_593853). (C) Multiple sequence alignment of Alg3 homologs generated using ClustalW 1.8. Identical residues and conservative amino acid substitutions are indicated by black and gray shading, respectively. The ER retention signal, KKXX-like (X = any amino acid) motif, is boxed.
