# Supplementary material for: Core N-Glycan Structures Are Critical for the Pathogenicity of Cryptococcus neoformans by Modulating Host Cell Death
Source: PubMed Central journal article supplement (PMC7218283; doi:10.1128/mbio.00711-20), 2020-05-12
Supplement: mBio.00711-20-sf002.pdf [file mBio.00711-20-sf002.pdf]

Supplementary Fig. 2

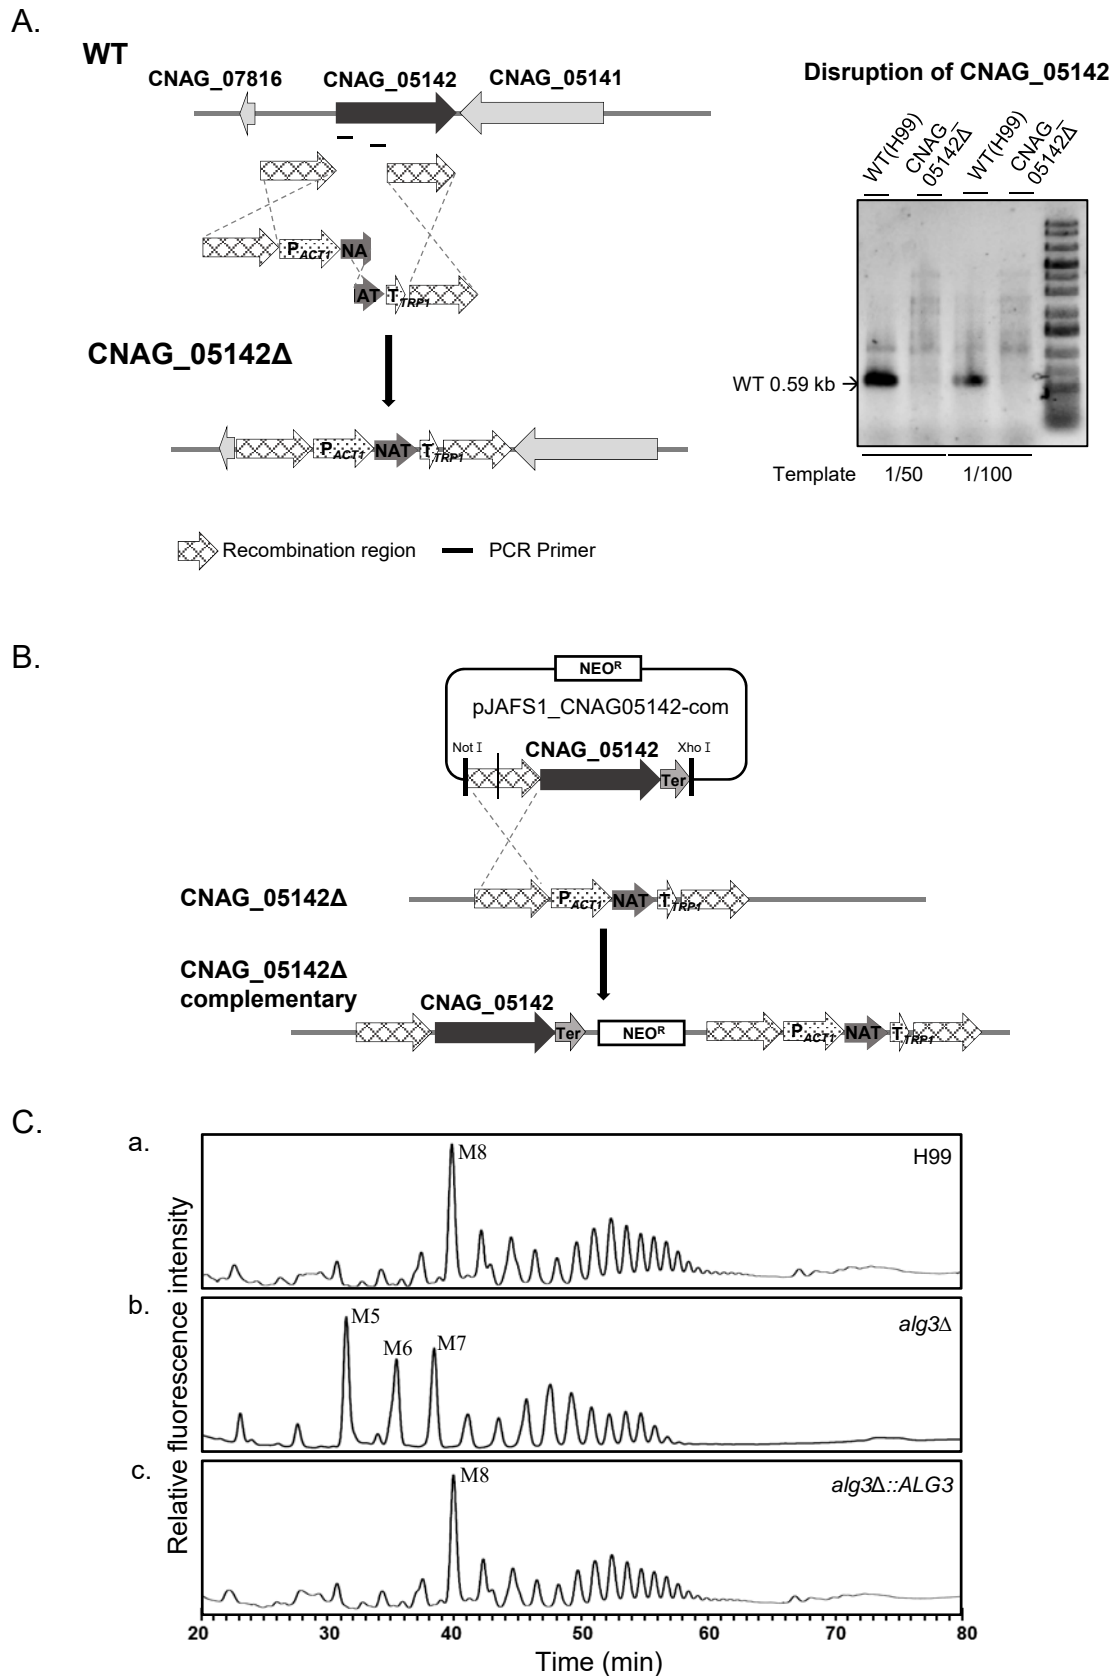

**FIG S2** Disruption of *ALG3* and construction of a complementation strain. (A) Strategy for CNAG\_05142 disruption using the nourseothricin acetyltransferase (NAT) split marker. Stable transformants were selected on YPD medium containing nourseothricin (100  $\mu$ g/ml) and were screened by PCR. (B) Scheme of construction of an *alg3Δ::ALG3* complementation strain. (C) HPLC-based neutral glycan profiles of WT, *alg3Δ*, and *alg3Δ::ALG3* strains.
