# Supplementary material for: Core N-Glycan Structures Are Critical for the Pathogenicity of Cryptococcus neoformans by Modulating Host Cell Death
Source: PubMed Central journal article supplement (PMC7218283; doi:10.1128/mbio.00711-20), 2020-05-12
Supplement: mBio.00711-20-sf003.pdf [file mBio.00711-20-sf003.pdf]

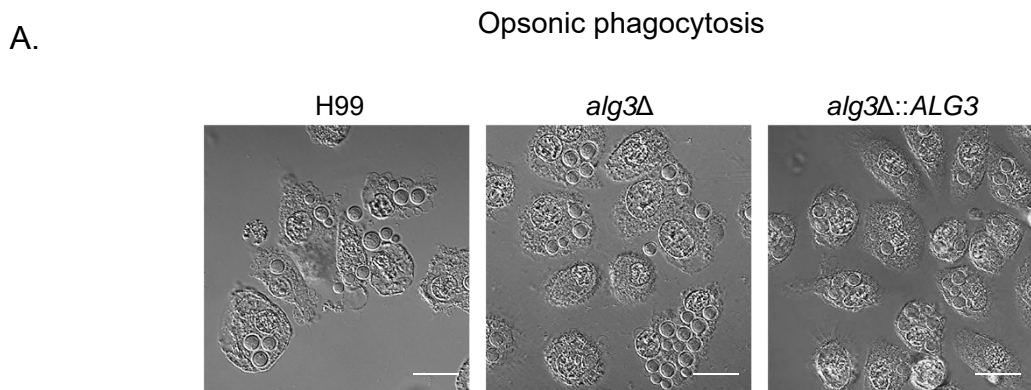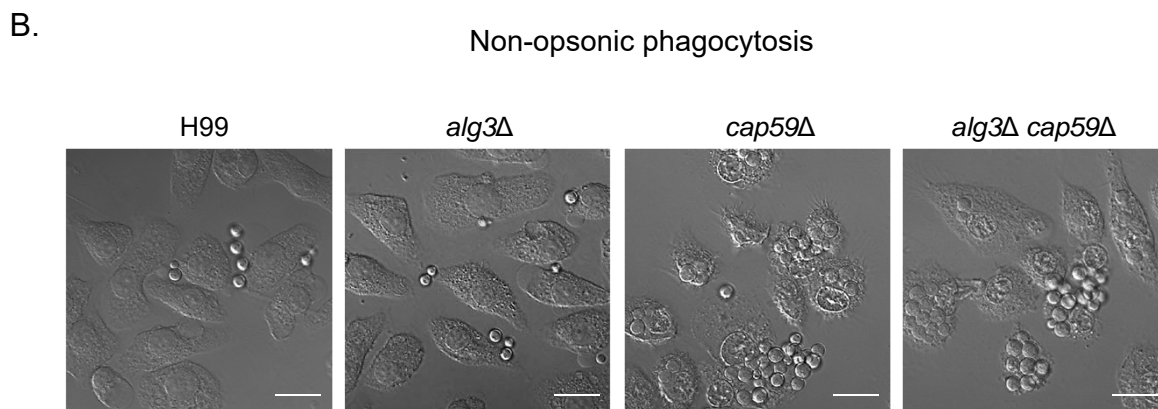

**FIG S3** Opsonic and non-opsonic phagocytosis. (A) Encapsular *C. neoformans* cells of WT, *alg3Δ*, and *alg3Δ::ALG3* were opsonized with 18B7 antibody and incubated with J774A.1 cells (*C. neoformans*/J774A.1 ratio, 10:1) for 2 h. Then, non-phagocytized yeast cells were removed by washing, and phagocytized yeast cells were evaluated by microscopy. (B) Acapsular yeast cells of WT, *alg3Δ*, *cap59Δ*, and *alg3Δ cap59Δ* were incubated with macrophages (*C. neoformans*/J774A.1 ratio, 10:1) for 2 h. Non-phagocytized yeast cells were removed and phagocytized yeast cells were evaluated under a Zeiss confocal microscope. Scale bars, 20  $\mu$ m.
