# Supplementary material for: Core N-Glycan Structures Are Critical for the Pathogenicity of Cryptococcus neoformans by Modulating Host Cell Death
Source: PubMed Central journal article supplement (PMC7218283; doi:10.1128/mbio.00711-20), 2020-05-12
Supplement: mBio.00711-20-sf004.pdf [file mBio.00711-20-sf004.pdf]

Supplementary Fig. 4

B.

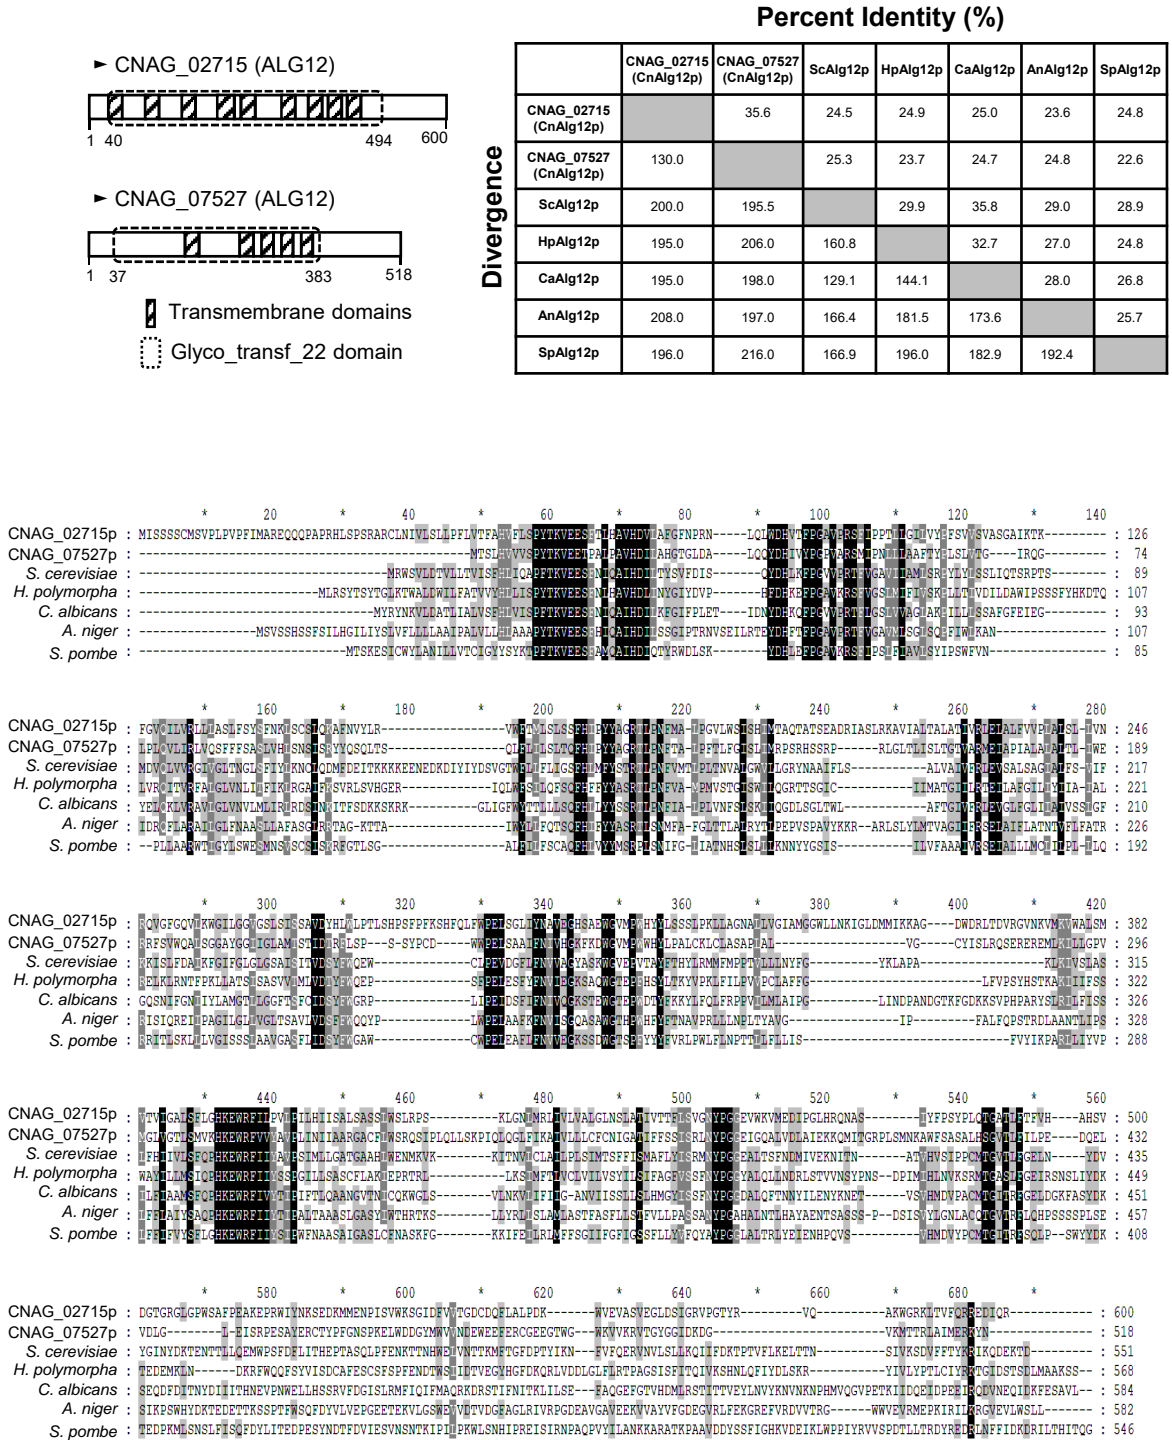

**FIG S4** Bioinformatics analysis of Alg9 and Alg12. (A, B) Predicted transmembrane and Glyco\_transf\_22 (glycosyltransferase 22 family) domains of Alg proteins are indicated by slashes and dotted boxes, respectively. Sequence identities and similarities between Alg9 and Alg12 homologs of *S. cerevisiae*, *H. polymorpha*, *C. albicans*, *A. niger*, and *S. pombe*. Multiple sequence alignment of Alg9 and Alg12 homologs generated using ClustalW 1.8. Identical residues and conservative amino acid substitutions are indicated by black and gray shading, respectively.
