# Supplementary material for: Core N-Glycan Structures Are Critical for the Pathogenicity of Cryptococcus neoformans by Modulating Host Cell Death
Source: PubMed Central journal article supplement (PMC7218283; doi:10.1128/mbio.00711-20), 2020-05-12
Supplement: mBio.00711-20-sf005.pdf [file mBio.00711-20-sf005.pdf]

Supplementary Fig. 5

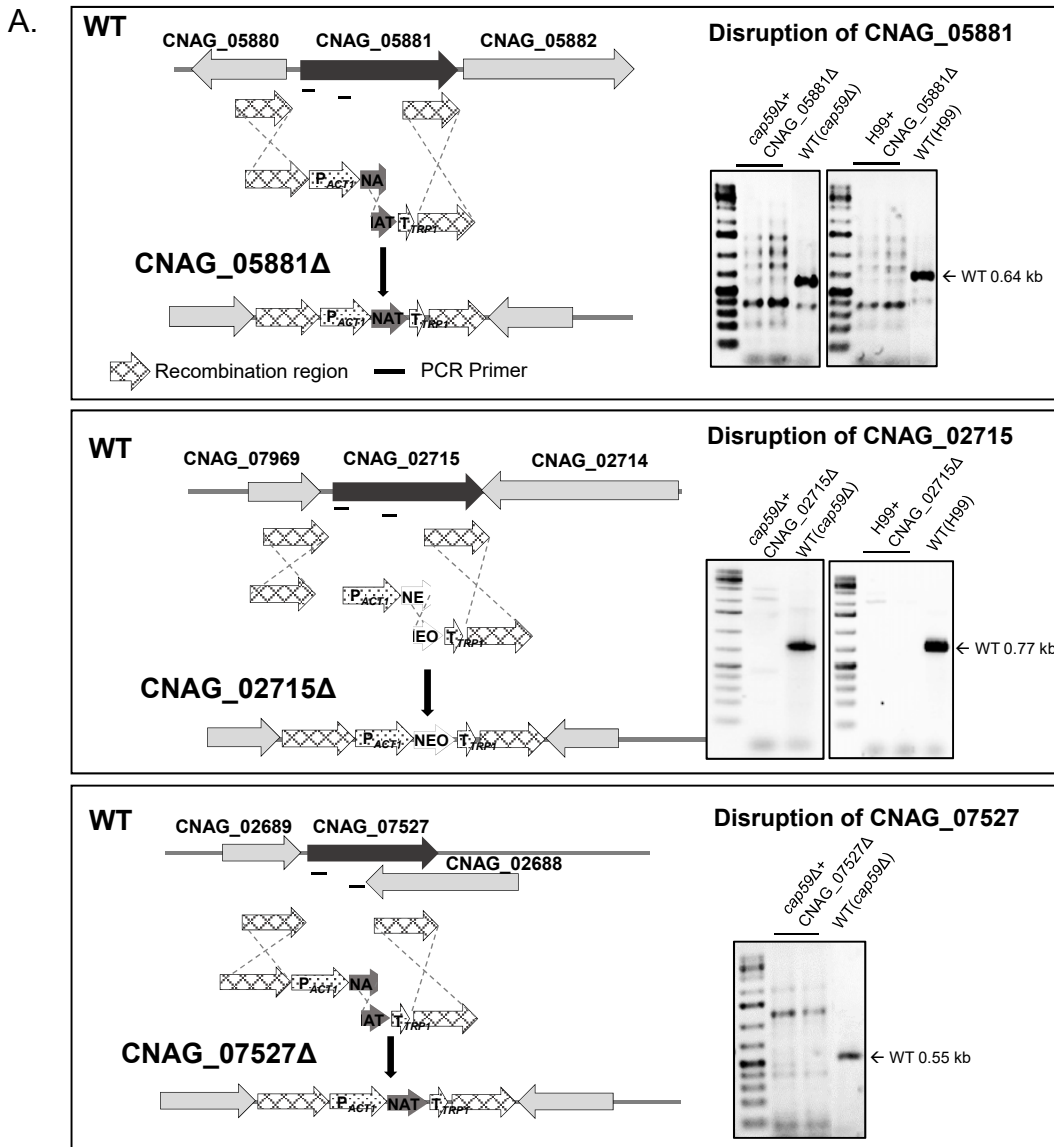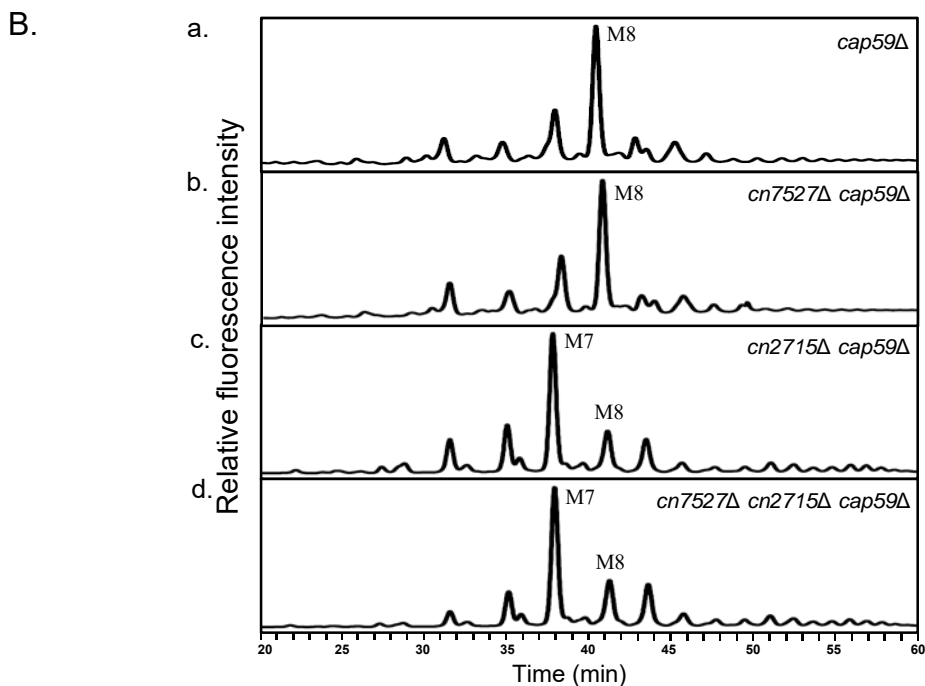

**FIG S5** Disruption of *ALG9* and *ALG12*. (A) Strategy for *CNAG\_05881* and *CNAG\_07527* disruption using the NAT split marker and *CNAG\_02715* disruption using the neomycin (*NEO*) split marker. Stable transformants were selected on YPD medium containing nourseothricin (100  $\mu$ g/ml) and neomycin (200  $\mu$ g/ml), respectively, and were screened by PCR. (B) HPLC-based neutral glycan profiles of *cap59Δ*, *alg9Δ cap59Δ*, and *alg12Δ cap59Δ* strains.
