# Supplementary material for: Core N-Glycan Structures Are Critical for the Pathogenicity of Cryptococcus neoformans by Modulating Host Cell Death
Source: PubMed Central journal article supplement (PMC7218283; doi:10.1128/mbio.00711-20), 2020-05-12
Supplement: mBio.00711-20-sf006.pdf [file mBio.00711-20-sf006.pdf]

Supplementary Fig. 6

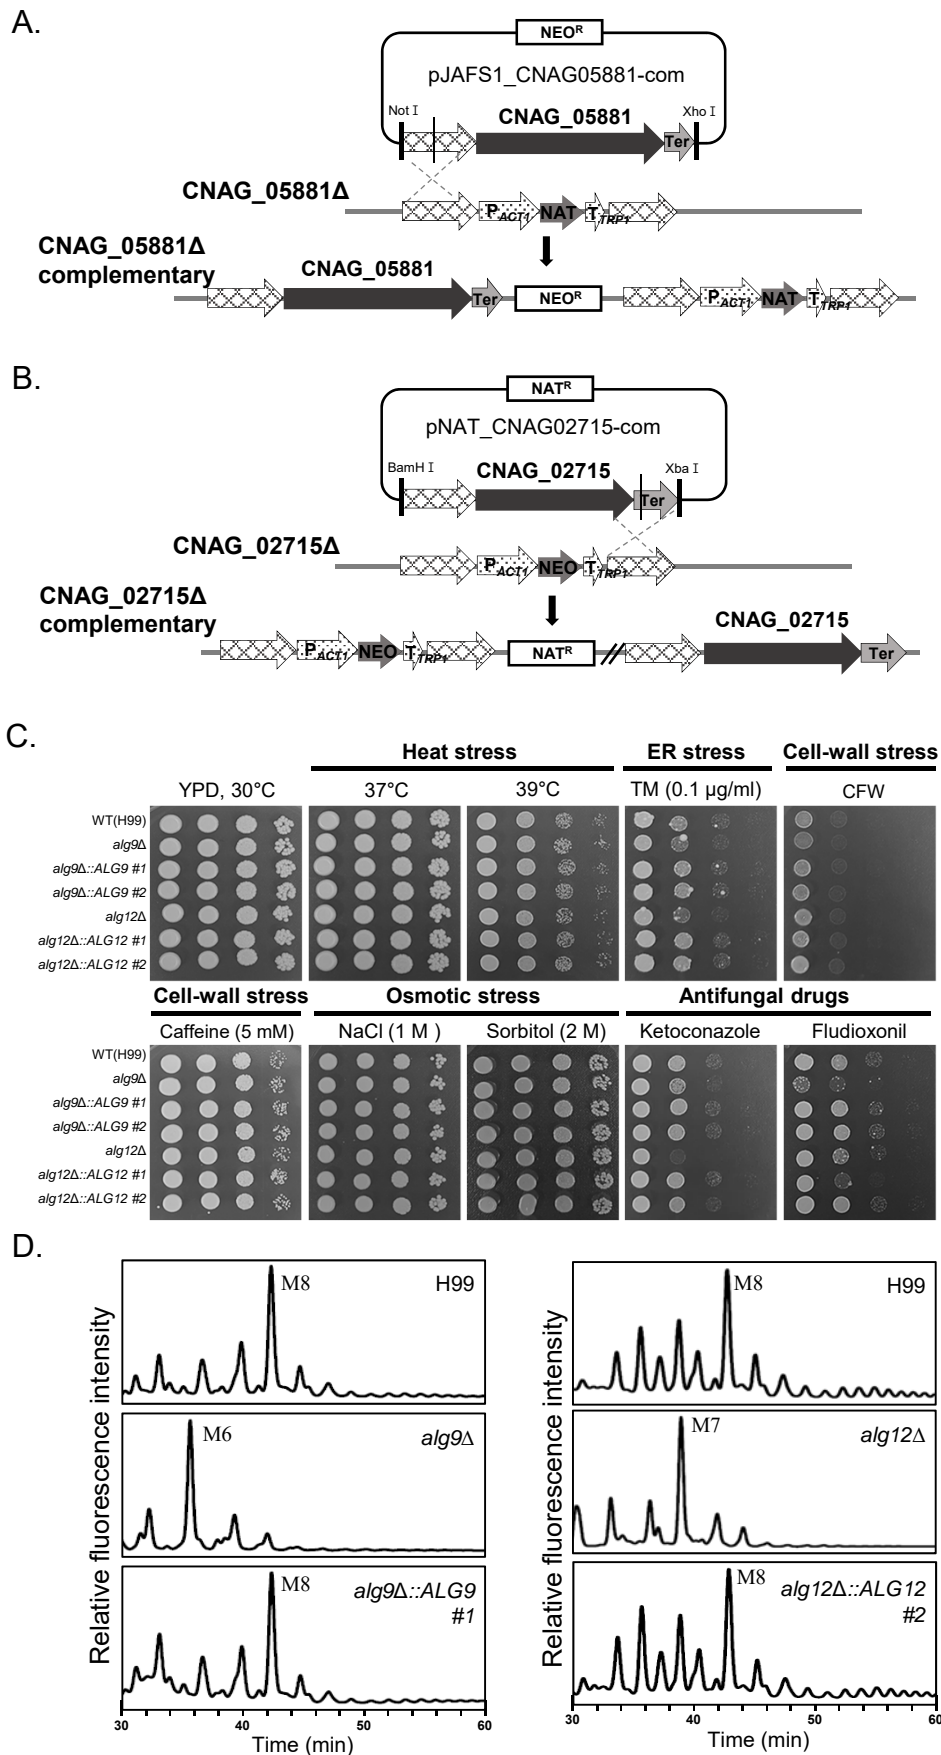

**FIG S6** Construction of *ALG9* and *ALG12* complementary strain. (A) Strategy for *CNAG\_05881* complementary using the *NEO* split marker. Stable transformants were selected on YPD medium containing *NEO*. (B) Strategy for *CNAG\_02715* complementary using the *NAT* split marker. Stable transformants were selected on YPD medium containing *NAT*. (C) Spotting analysis of growth recovery of *C. neoformans* *alg9Δ::ALG9* and *alg12Δ::ALG12* strains under heat stress, ER stress, cell-wall stress, osmotic stress, and antifungal drug treatments. (D) HPLC-based neutral glycan profiles of H99, *alg9Δ*, *alg9Δ::ALG9 #1*, *alg12Δ* and *alg12Δ::ALG12 #2* strains.
